# Supplementary material for: Inherited DNA methylation primes the establishment of accessible chromatin during genome activation
Source: HighWire-hosted journal article supplement (doi:10.1101/gr.228833.117), 2018-05-29
Supplement: Supplemental_Fig_S2.pdf [file Supplemental_Fig_S2.pdf]

Supplemental\_Fig\_S2

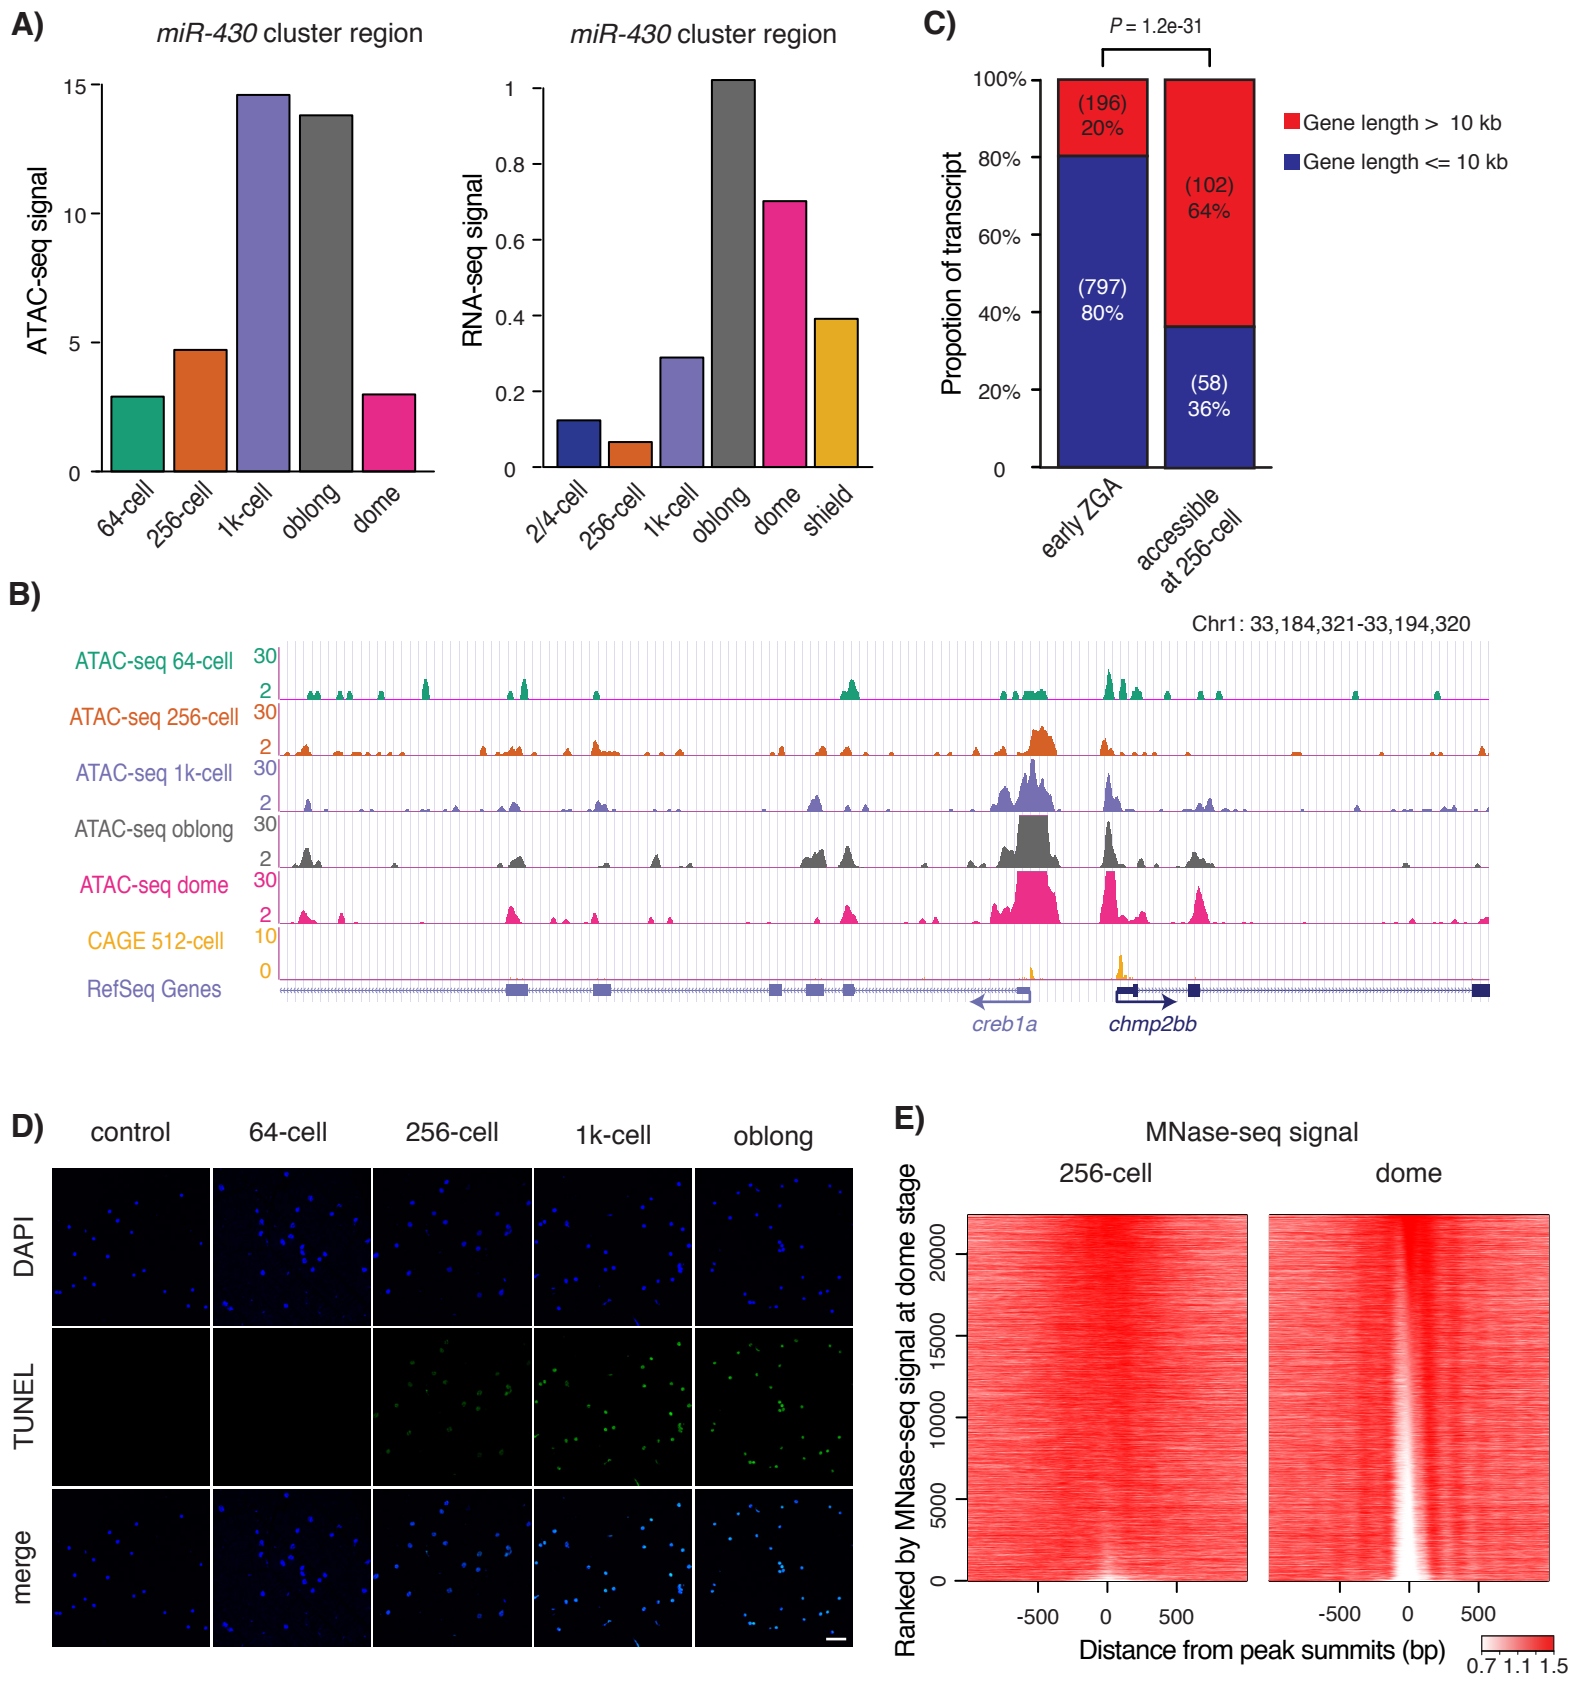

**Supplemental Figure S2.** Establishment of accessible chromatin during the minor phase of ZGA. (A) The box plot shows continuously elevated trend until the dome stage on the normalized ATAC-seq and RNA-seq signals for the *miR-430* cluster, which was reported to play roles in the clearance of maternal mRNAs. The *miR-430* cluster region is indicated by the dashed box in Fig. 1B. (B) The genome browser view shows the ATAC-seq signals at the *creb1a* locus as a representative example of accessible chromatin that appears at the 256-cell stage. (C) The bar plots show the proportion of long ( $> 10$  kb) and short ( $\leq 10$  kb) genes for the reported early ZGA genes and genes with accessible promoters at the 256-cell stage. *p-values* were calculated by Chi-squared test. (D) Confocal images of DNase I TUNEL assay for chromatin accessibility during ZGA. Cell nuclei were stained with DAPI (blue), and chromatin accessibility were labelled with DNase I TUNEL (green). Control is embryos at oblong stage without DNase I digestion. Scale bar: 50 $\mu$ m. (E) Heatmap of nucleosome organization profiles of 256-cell stage (left panel) and dome stage (right panel) across chromatin regions detected as accessible in dome stage and inaccessible in 256-cell stage. Regions were ranked by the average MNase-seq signals of the central 50 bp window at dome stage. Regions with very low MNase-seq signals (average signal of the 2 kb window  $< 0.8$ ) were not shown.
