# Supplementary material for: Inherited DNA methylation primes the establishment of accessible chromatin during genome activation
Source: HighWire-hosted journal article supplement (doi:10.1101/gr.228833.117), 2018-05-29
Supplement: Supplemental_Fig_S3.pdf [file Supplemental_Fig_S3.pdf]

Supplemental\_Fig\_S3

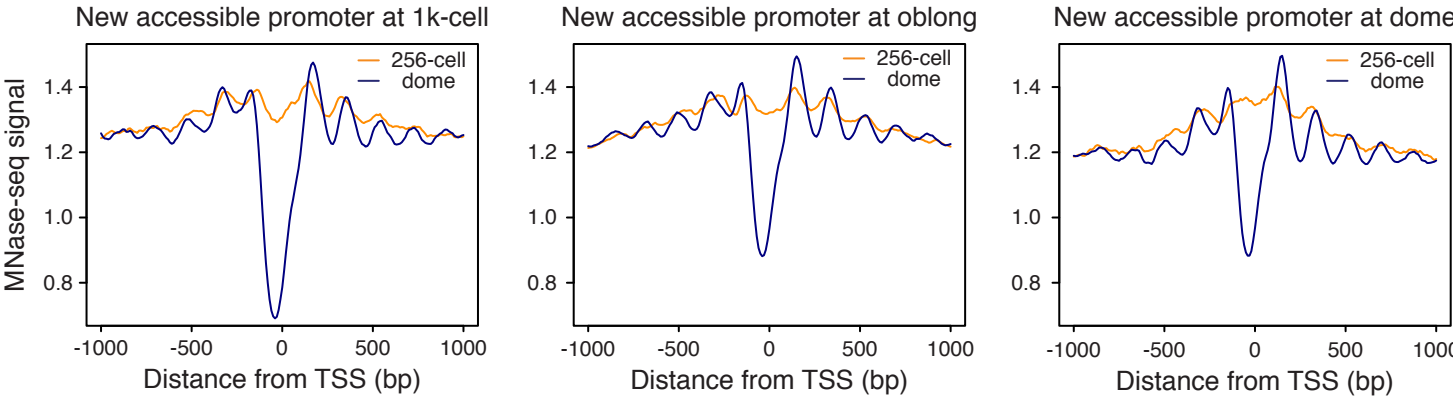

**Supplemental Figure S3.** Average MNase-seq signals of 256-cell (dark orange) and dome (navy) stage show the formation of a clear nucleosome depletion pattern during ZGA at the promoters with newly emerged accessible chromatin at the 1k-cell stage (left), oblong stage (middle) and dome stage (right).
