# Supplementary material for: Inherited DNA methylation primes the establishment of accessible chromatin during genome activation
Source: HighWire-hosted journal article supplement (doi:10.1101/gr.228833.117), 2018-05-29
Supplement: Supplemental_Fig_S5.pdf [file Supplemental_Fig_S5.pdf]

A)

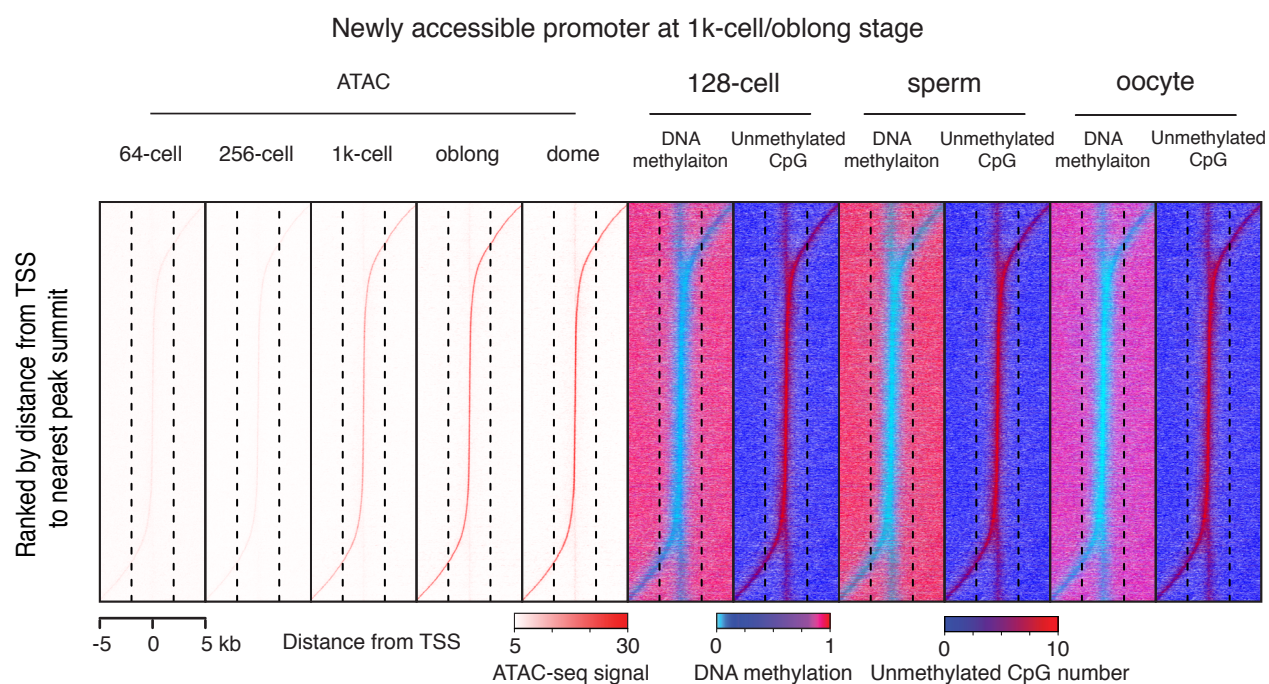

B)

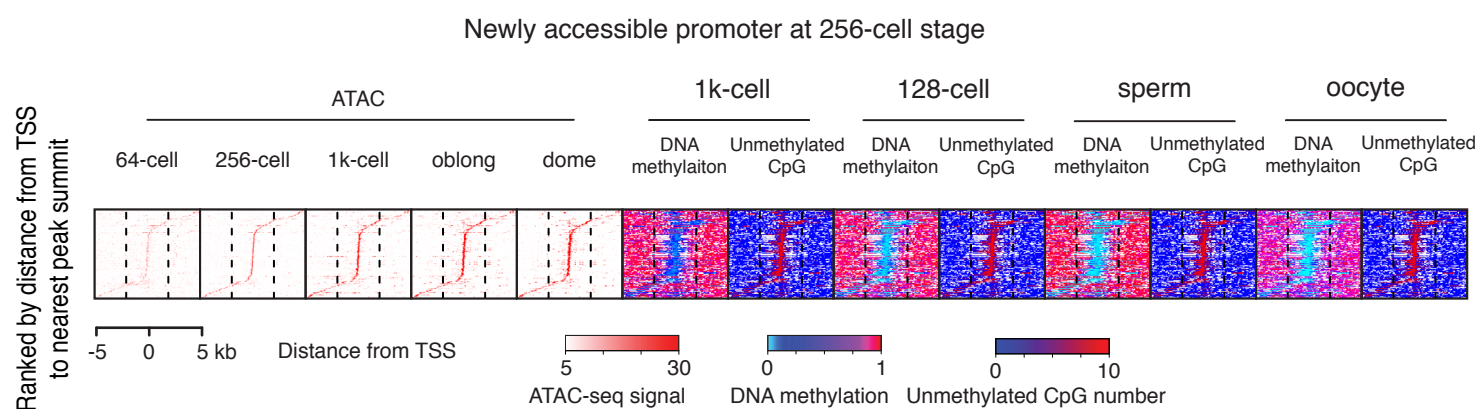

C)

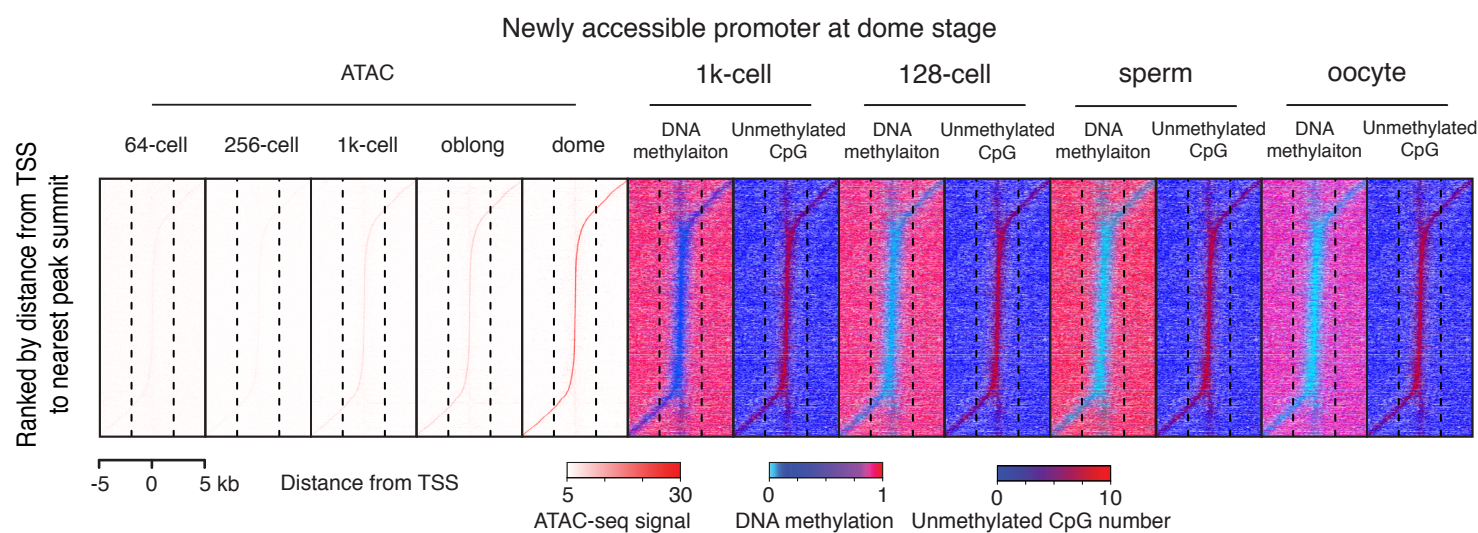

**Supplemental Figure S5.** The heatmap shows the relationship between the locations of the ATAC-seq signals, DNA methylation level and unmethylated CpG number at the promoters. The accessible promoters are newly emerged ones in 1k-cell or oblong stages (A), 256-cell stage (B) and dome stage (C).
