# Supplementary material for: Inherited DNA methylation primes the establishment of accessible chromatin during genome activation
Source: HighWire-hosted journal article supplement (doi:10.1101/gr.228833.117), 2018-05-29
Supplement: Supplemental_file.docx [file Supplemental_file.docx]

**Supplemental Text**

**Transcription activity of genes with accessible promoters during minor phase of ZGA**

To investigate the quantitative association between chromatin accessibility and transcription activity at the minor phase of ZGA, we ranked all genes according to the level of chromatin accessibility at the promoters and performed a gene set enrichment analysis (GSEA) (Subramanian et al. 2005) by treating the genes with over 500 CAGE reads around their TSS (TSS ± 50bp, 811 genes) and the reported early ZGA genes (993 genes) (Heyn et al. 2014) as two separate gene sets. We observed that genes with higher levels of chromatin accessibility at their promoters were significantly enriched for both gene sets (Fig. 1D, E), indicating that chromatin accessibility at the minor phase of ZGA had a clear association with the transcription activity. A previous report suggested that the short cell cycle during the minor phase of ZGA may only allow the formation of short transcripts (Heyn et al. 2014). As expected, most of these genes were much longer than the reported early ZGA genes (Supplemental Fig. S2C). Taken together, only a small number of genes have accessible chromatin at their promoters during the minor phase of ZGA, and such accessibility is closely related to transcription activity.

**Supplemental** **Methods**

**ATAC-seq**

Embryos at each stage were harvested and washed 3 times with ice-cold PBS. The embryos were resuspended in cold lysis buffer (10 mM Tris-HCL, pH 7.4, 10 mM NaCl, 3 mM MgCl2, 0.1% IGEPAL CA-630), lysed by pipetting up and down 5-10 times using a wide pipet, and kept on ice for 5 minutes. The isolated nuclei were then pelleted and resuspended in transposition reactions (25 μl 2 × TD Buffer, 2.5 μl Tn5 transposases, 22.5 μl Nuclease-Free H2O) for 30 minutes at 37℃ and then purified using the Qiagen MinElute Kit (Qiagen, 28004). PCR was performed to yield the libraries by adding different barcodes with NEBNext High-Fidelity 2 × PCR Master Mix (NEB, #M0541), and the PCR conditions were as follows: 72℃ for 5 min and 98℃ for 30 s, followed by 15 cycles at 98℃ for 10 s, 63℃ for 30 s, and 72℃ for 1 min, with a final hold at 4℃. The libraries were then purified with Agencourt AMPure XP beads (Beckman Coulter Genomics, p/n A63881) and sequenced by Illumina HiSeq X Ten sequencing.

All sequenced reads were cut to 40 bp from the 3’ end and mapped to the zebrafish genome. The reads were then filtered as follows: only the reads that aligned concordantly to the nuclear DNA with MAPQ ≥ 30 were kept; the duplicate read pairs that aligned to the same location in the genome were collapsed into one. For ATAC-seq data, reads pairs with fragment length ≤ 100 bp were considered to provide nucleosome-free (i.e. accessible chromatin) signals (Buenrostro et al. 2013). Therefore, we only used reads pairs with fragment length ≤ 100 bp as effective fragments for the following analysis. For each effective fragment, one read was randomly selected, extended to 50 bp. The bigwig file for each replicate was obtained by piling-up the extended reads using genomeCoverageBed (version 2.20.1) (Quinlan and Hall 2010) and bedGraphToBigWig (Kent et al. 2010) with normalization to 1 M reads. Next, we divided the zebrafish genome into 5-kb windows, and calculated the summed signal in each window. Pearson correlation was calculated between replicates. Then, we combined replicates from each stage for the analysis and perform peak calling.

**DNase I TUNEL assay**

Embryos at each stage were transferred to agar coated dishes (2% agar in Embryo Medium), and chorions were removed by immersing embryos in a 37℃ heated pronase (2mg/ml in Embryo Medium) for 10min, RT. Embryos washed three times with PBS and transferred into a sterile centrifuge tube. Supernatant was removed carefully. DNase I digestion was performed by reported protocol (Jin et al. 2015) with some modifications. Embryos were treated with 150µl lysis buffer (10mM Tris-HCl, pH 7.5, 10mM NaCl, 3mM MgCl2 + 0.1% Triton X-100), kept on ice for 2 min. After digested with 8.3U DNase I (Roche, 04716728001) at 37℃ for 5min, embryos were fixed for 10 min with 2% PFA/PBS and centrifuged at 500 g for 5 min. Resuspended cells were coated to pre-cold polysine slides (Thermo scientific, P4981), dried at 50℃ for 5-10min. TUNEL assays were performed using DeadEndTM Fluorometric TUNEL System (Promega, G3250) according to the manufacturer’s instructions. The nuclei were dyed with DAPI (ProLong™ Gold Antifade Mountant with DAPI, Invitrogen, P36931). Blue and green fluorescence were detected by confocal fluorescence microscopy (Leica, TCS SP5 II). Embryos in control group were collected at oblong stage and preformed the same procedure without DNase I digestion.

**MNase-seq data analysis**

MNase-seq data were collected from GEO with accessions GSM1081552 and GSM1081554. MNase-seq data were processed as previous described (Zhang et al. 2014).

**ChIP-seq data analysis**

ChIP-seq data were collected from GEO with accession GSE34684 (Xu et al. 2012) and GSE39780 (Leichsenring et al. 2013). ChIP-seq data were mapped back to the zebrafish genome (zv9 assembly) using Bowtie (version 2.2.3) (Langmead and Salzberg 2012) with default parameters. Only the reads with MAPQ ≥ 30 were kept for the following analysis. Peak calling was performed using MACS (version 2.0.10.20131028) (Zhang et al. 2008) with the following parameters: –g 1.4e9 –B --SPMR –q 0.01. Bigwig files were generated using genomeCoverageBed (version 2.20.1) (Quinlan and Hall 2010) and bedGraphToBigWig (Kent et al. 2010) with normalization to 1 M reads.

**Expression data analysis**

RNA-seq data were collected from GEO with accessions GSE32898 (Pauli et al. 2012), GSM1289382 (Zhang et al. 2014) and GSM1531258 (Rabani et al. 2014). Reads were mapped back to the zebrafish genome (zv9 assembly) using TopHat (version 2.0.12) (Kim et al. 2013). Expression levels were quantified to FPKM using Cufflinks (version 2.2.1) (Trapnell et al. 2010). CAGE data were obtained from <http://promshift.genereg.net/zebrafish/> (Haberle et al. 2014).

**DNA methylation data analysis**

WGBS data were collected from GEO with accessions GSE44075 (Jiang et al. 2013) and GSE68087 (Bogdanovic et al. 2016). All reads were mapped back to the zebrafish genome (zv9 assembly) using BSMAP (version 2.7.4) (Xi and Li 2009) with parameter –R. Methylation levels for each cytosine were generated by mCall (version 1.3.2) (Sun et al. 2014). The DNA methylation level for each region was determined using the average methylation level of the CpGs in the region with sequencing depth ≥ 10. The unmethylated CpGs were defined as a methylation level ≤ 0.2.

**Prediction of the ATAC-seq peak summit location at promoters**

Promoters with one newly accessible regions at either 1k-cell or oblong stages were used for calculating prediction power. For each promoter, we divided it into 20 bins (with length 200 bp for each bin) and obtained the DNA methylation level and unmethylated CpG number in each bin. When the ATAC-seq peak summit was located in the same bin (or in the most adjacent bin) that had the lowest methylation level or highest unmethylated CpG number among the 20 bins, we regarded this promoter as a successful case for the prediction of the ATAC-seq peak summit based on the DNA methylation level or unmethylated CpG number.

**GO analysis**

Functional annotation clustering was performed using the Database for Annotation, Visualization and Integrated Discovery (DAVID) Bioinformatics Resource (version 6.8) (Huang da et al. 2009b; Huang da et al. 2009a). Terms for each GO functional cluster were filtered with an enrichment score > 3 and summarized using a representative term.

**Genome browser**

The genome browser view was performed using the UCSC genome browser (Kent et al. 2002; Raney et al. 2014) and visualized with smoothing with a mean of 5 pixels.

**Supplemental References**

Bogdanovic O, Smits AH, de la Calle Mustienes E, Tena JJ, Ford E, Williams R, Senanayake U, Schultz MD, Hontelez S, van Kruijsbergen I et al. 2016. Active DNA demethylation at enhancers during the vertebrate phylotypic period. *Nat Genet* **48**: 417-426.

Buenrostro JD, Giresi PG, Zaba LC, Chang HY, Greenleaf WJ. 2013. Transposition of native chromatin for fast and sensitive epigenomic profiling of open chromatin, DNA-binding proteins and nucleosome position. *Nat Methods* **10**: 1213-1218.

Haberle V, Li N, Hadzhiev Y, Plessy C, Previti C, Nepal C, Gehrig J, Dong X, Akalin A, Suzuki AM et al. 2014. Two independent transcription initiation codes overlap on vertebrate core promoters. *Nature* **507**: 381-385.

Heyn P, Kircher M, Dahl A, Kelso J, Tomancak P, Kalinka AT, Neugebauer KM. 2014. The earliest transcribed zygotic genes are short, newly evolved, and different across species. *Cell Rep* **6**: 285-292.

Huang da W, Sherman BT, Lempicki RA. 2009a. Bioinformatics enrichment tools: paths toward the comprehensive functional analysis of large gene lists. *Nucleic Acids Res* **37**: 1-13.

Huang da W, Sherman BT, Lempicki RA. 2009b. Systematic and integrative analysis of large gene lists using DAVID bioinformatics resources. *Nat Protoc* **4**: 44-57.

Jiang L, Zhang J, Wang JJ, Wang L, Zhang L, Li G, Yang X, Ma X, Sun X, Cai J et al. 2013. Sperm, but not oocyte, DNA methylome is inherited by zebrafish early embryos. *Cell* **153**: 773-784.

Jin W, Tang Q, Wan M, Cui K, Zhang Y, Ren G, Ni B, Sklar J, Przytycka TM, Childs R et al. 2015. Genome-wide detection of DNase I hypersensitive sites in single cells and FFPE tissue samples. *Nature* **528**: 142-146.

Kent WJ, Sugnet CW, Furey TS, Roskin KM, Pringle TH, Zahler AM, Haussler D. 2002. The human genome browser at UCSC. *Genome Res* **12**: 996-1006.

Kent WJ, Zweig AS, Barber G, Hinrichs AS, Karolchik D. 2010. BigWig and BigBed: enabling browsing of large distributed datasets. *Bioinformatics* **26**: 2204-2207.

Kim D, Pertea G, Trapnell C, Pimentel H, Kelley R, Salzberg SL. 2013. TopHat2: accurate alignment of transcriptomes in the presence of insertions, deletions and gene fusions. *Genome Biol* **14**: R36.

Langmead B, Salzberg SL. 2012. Fast gapped-read alignment with Bowtie 2. *Nat Methods* **9**: 357-359.

Leichsenring M, Maes J, Mossner R, Driever W, Onichtchouk D. 2013. Pou5f1 transcription factor controls zygotic gene activation in vertebrates. *Science* **341**: 1005-1009.

Pauli A, Valen E, Lin MF, Garber M, Vastenhouw NL, Levin JZ, Fan L, Sandelin A, Rinn JL, Regev A et al. 2012. Systematic identification of long noncoding RNAs expressed during zebrafish embryogenesis. *Genome Res* **22**: 577-591.

Quinlan AR, Hall IM. 2010. BEDTools: a flexible suite of utilities for comparing genomic features. *Bioinformatics* **26**: 841-842.

Rabani M, Raychowdhury R, Jovanovic M, Rooney M, Stumpo DJ, Pauli A, Hacohen N, Schier AF, Blackshear PJ, Friedman N et al. 2014. High-resolution sequencing and modeling identifies distinct dynamic RNA regulatory strategies. *Cell* **159**: 1698-1710.

Raney BJ, Dreszer TR, Barber GP, Clawson H, Fujita PA, Wang T, Nguyen N, Paten B, Zweig AS, Karolchik D et al. 2014. Track data hubs enable visualization of user-defined genome-wide annotations on the UCSC Genome Browser. *Bioinformatics* **30**: 1003-1005.

Subramanian A, Tamayo P, Mootha VK, Mukherjee S, Ebert BL, Gillette MA, Paulovich A, Pomeroy SL, Golub TR, Lander ES et al. 2005. Gene set enrichment analysis: a knowledge-based approach for interpreting genome-wide expression profiles. *Proc Natl Acad Sci U S A* **102**: 15545-15550.

Sun D, Xi Y, Rodriguez B, Park HJ, Tong P, Meong M, Goodell MA, Li W. 2014. MOABS: model based analysis of bisulfite sequencing data. *Genome Biol* **15**: R38.

Trapnell C, Williams BA, Pertea G, Mortazavi A, Kwan G, van Baren MJ, Salzberg SL, Wold BJ, Pachter L. 2010. Transcript assembly and quantification by RNA-Seq reveals unannotated transcripts and isoform switching during cell differentiation. *Nat Biotechnol* **28**: 511-515.

Xi Y, Li W. 2009. BSMAP: whole genome bisulfite sequence MAPping program. *BMC Bioinformatics* **10**: 232.

Xu C, Fan ZP, Muller P, Fogley R, DiBiase A, Trompouki E, Unternaehrer J, Xiong F, Torregroza I, Evans T et al. 2012. Nanog-like regulates endoderm formation through the Mxtx2-Nodal pathway. *Dev Cell* **22**: 625-638.

Zhang Y, Liu T, Meyer CA, Eeckhoute J, Johnson DS, Bernstein BE, Nusbaum C, Myers RM, Brown M, Li W et al. 2008. Model-based analysis of ChIP-Seq (MACS). *Genome Biol* **9**: R137.

Zhang Y, Vastenhouw NL, Feng J, Fu K, Wang C, Ge Y, Pauli A, van Hummelen P, Schier AF, Liu XS. 2014. Canonical nucleosome organization at promoters forms during genome activation. *Genome Res* **24**: 260-266.
