# Supplementary material for: Inherited DNA methylation primes the establishment of accessible chromatin during genome activation
Source: HighWire-hosted journal article supplement (doi:10.1101/gr.228833.117), 2018-05-29
Supplement: Supplemental_Table_S1.xlsx [file Supplemental_Table_S1.xlsx]

## Sheet: Sheet1
Supplemental Table S1: Summary of ATAC-seq experiment in this study. Number of embryo used in each replicate and the sequencing reads for each replicate are shown.
Sample	Stage	hpf	Embryo number	Raw reads (pair)	Mapped reads (pair)	Unique nuclear fragments	Effective fragments
ATAC 64-cell rep1	64-cell	2 h	8	71131449	24674025	3853330	1257644
ATAC 64-cell rep2	64-cell	2 h	8	24371107	9386614	2836969	1214380
ATAC 64-cell rep3	64-cell	2 h	8	34145949	16082375	3651416	1762726
ATAC 256-cell rep1	256-cell	2.5 h	20	32652740	16764359	6466545	2573996
ATAC 256-cell rep2	256-cell	2.5 h	20	36412176	16614074	4821094	2135092
ATAC 256-cell rep3	256-cell	2.5 h	20	37830130	15455616	6851652	3344245
ATAC 1k-cell rep1	1k-cell	3 h	5	61707223	23550707	9554009	3477937
ATAC 1k-cell rep2	1k-cell	3 h	5	37759148	14584996	5395856	2516029
ATAC 1k-cell rep3	1k-cell	3 h	5	45820266	18071127	8577622	3840462
ATAC oblong rep1	oblong	3.7 h	12	42861646	31935917	13518752	6258155
ATAC oblong rep2	oblong	3.7 h	12	25424297	18282141	9931573	3881181
ATAC oblong rep3	oblong	3.7 h	12	41539868	30660826	13685944	3647145
ATAC dome rep1	dome	4.5 h	3	60584441	34264400	9646289	3202432
ATAC dome rep2	dome	4.5 h	3	38873710	24811217	11302927	4977488
ATAC dome rep3	dome	4.5 h	3	30421224	20756658	8492058	2777330
ATAC control MO rep1	oblong	3.7 h	12	40024001	26639695	11254793	6024471
ATAC control MO rep2	oblong	3.7 h	12	44886480	29239616	12597943	5201866
ATAC control MO rep3	oblong	3.7 h	12	45537263	29652025	10774955	4629377
ATAC nanog MO rep1	oblong	3.7 h	12	33315656	12151821	5658512	1990150
ATAC nanog MO rep2	oblong	3.7 h	12	39755787	14862181	5995605	1430183
ATAC nanog MO rep3	oblong	3.7 h	12	34223241	19285753	9115448	3170435
ATAC pou5f3 MO rep1	oblong	3.7 h	12	35089571	20259055	9144210	2885860
ATAC pou5f3 MO rep2	oblong	3.7 h	12	34376331	20583139	9149542	2875257
ATAC pou5f3 MO rep3	oblong	3.7 h	12	32646657	19763764	9163926	3437550
ATAC nanog MO with mRNA rescue rep1	oblong	3.7 h	12	34606384	17128707	7433040	1831066
ATAC nanog MO with mRNA rescue rep2	oblong	3.7 h	12	34599706	20623658	9745584	3078954
ATAC nanog MO with mRNA rescue rep3	oblong	3.7 h	12	38334585	22202339	9342631	2593565
ATAC pou5f3 MO with mRNA rescue rep1	oblong	3.7 h	12	41008532	13294380	6388879	2461802
ATAC pou5f3 MO with mRNA rescue rep2	oblong	3.7 h	12	38600104	15798955	5656643	925908
ATAC pou5f3 MO with mRNA rescue rep3	oblong	3.7 h	12	32470751	17473875	8281003	3210815
ATAC smarca4a MO rep1	oblong	3.7 h	12	35771163	18954238	9058472	4427992
ATAC smarca4a MO rep2	oblong	3.7 h	12	29127867	16692652	6746257	3232122
ATAC cxxc1b MO rep1	oblong	3.7 h	12	28816719	21222033	8842337	2897979
ATAC cxxc1b MO rep2	oblong	3.7 h	12	24845572	17791924	5981419	2086209
ATAC cxxc1b MO rep3	oblong	3.7 h	12	28339342	21006493	9211848	3090984
ATAC kmt2a MO rep1	oblong	3.7 h	12	35917480	13727593	4729189	1706082
ATAC kmt2a MO rep2	oblong	3.7 h	12	31320148	13203667	5870327	1905151
ATAC kmt2a MO rep3	oblong	3.7 h	12	32983934	12760589	4318574	1410110
