# Supplementary material for: Inherited DNA methylation primes the establishment of accessible chromatin during genome activation
Source: HighWire-hosted journal article supplement (doi:10.1101/gr.228833.117), 2018-05-29
Supplement: Supplemental_Table_S2.xlsx [file Supplemental_Table_S2.xlsx]

## Sheet: Sheet1
Supplemental Table S2. Summary of high-throughput data used in this study. Developmental stage and hpf for each dataset are shown.
Stage	hpf	Data type	Accession	Reference
sperm	N/A	WGBS	GSE44075	(Jiang et al. 2013)
oocyte	N/A	WGBS	GSE44075	(Jiang et al. 2013)
2/4-cell	0.8hpf	RNA-seq	GSE32898	(Pauli et al. 2012)
64-cell	2hpf	ATAC-seq	GSE101779	this study
128-cell	2.25hpf	WGBS	GSE44075	(Jiang et al. 2013)
256-cell	2.5hpf	ATAC-seq	GSE101779	this study
256-cell	2.5hpf	MNase-seq	GSM1081552	(Zhang et al. 2014)
256-cell	2.5hpf	RNA-seq	GSM1289382	(Zhang et al. 2014)
512-cell	2.75hpf	CAGE	N/A	(Haberle et al. 2014)
1k-cell	3hpf	ATAC-seq	GSE101779	this study
1k-cell	3hpf	WGBS	GSE44075	(Jiang et al. 2013)
1k-cell	3hpf	RNA-seq	GSE32898	(Pauli et al. 2012)
oblong	3.5hpf	ChIP-seq (Nanog)	GSM853234	(Xu et al. 2012)
oblong	3.5hpf	RNA-seq	GSM1531258	(Rabani et al. 2014)
oblong	3.7hpf	ATAC-seq	GSE101779	this study
dome	4.3hpf	ATAC-seq	GSE101779	this study
dome	4.5hpf	MNase-seq	GSM1081554	(Zhang et al. 2014)
30%/50% epiboly	5hpf	ChIP-seq (Pou5f3)	GSM978985	(Leichsenring et al. 2013)
prim-5	24hpf	ATAC-seq	GSE68087	(Bogdanovic et al. 2016)
prim-5	24hpf	WGBS	GSE68087	(Bogdanovic et al. 2016)
