# Supplementary material for: Inherited DNA methylation primes the establishment of accessible chromatin during genome activation
Source: HighWire-hosted journal article supplement (doi:10.1101/gr.228833.117), 2018-05-29
Supplement: Supplemental_Table_S3.xlsx [file Supplemental_Table_S3.xlsx]

## Sheet: Sheet1
Supplemental Table S3. MO sequence used for injection.
Gene	Sequence
cxxc1b	5’-A(CAT)TTCGCTGTCCATCGCTGCTC-3’
kmt2a	5’-TGCGC(CAT)TTTACACTCTGCCTGCC-3’
pou5f3	5’-CGCTCTCTCCGT(CAT)CTTTCCGCTA-3’
nanog	5’-CTGGCATCTTCCAGTCCGC(CAT)TTC-3’
smarca4a	5’-CATGGGTGGGTCAGGAGTGGA(CAT)C-3’
Standard ctrl	5’-CCTCTTACCTCAGTTACAATTTATA-3’
