# Supplementary material for: Inherited DNA methylation primes the establishment of accessible chromatin during genome activation
Source: HighWire-hosted journal article supplement (doi:10.1101/gr.228833.117), 2018-05-29
Supplement: Supplemental_Table_S4.xlsx [file Supplemental_Table_S4.xlsx]

## Sheet: Sheet1
Supplemental Table S4. Primers used for PCR cloning.
Gene		Sequence
pou5f3-wt	Forward	5’-TTGTTCTTTTTGCAGATGACGGAGAGAGCGCAGAG -3’
	Reverse	5’-GGCGACCGGTGGATCGCTGGTGAGATGACCCACCA-3’
nanog-wt	Forward	5’-TTGTTCTTTTTGCAGATGGCGGACTGGAAGATGCCA-3’
	Reverse	5’-GGCGACCGGTGGATCCAGCAAAGTTATTCCTTTAG-3’
pou5f3-mutation	Forward	5’-TTGTTCTTTTTGCAGATGACcGAaAGgGCcCAaAG -3’
	Reverse	5’-CTtTGgGCcCTtTCgGTCATCTGCAAAAAGAACAA-3’
nanog-mutation	Forward	5’-TTGTTCTTTTTGCAGATGGCcGAtTGGAAaATGCCg-3’
	Reverse	5’-cGGCATtTTCCAaTCgGCCATCTGCAAAAAGAACAA-3’
